# Supplementary material for: Precision drugging of the MAPK pathway in head and neck cancer
Source: PubMed Central journal article supplement (PMC8927572; doi:10.1038/s41525-022-00293-1), 2022-03-16
Supplement: 41525_2022_293_MOESM1_ESM.pdf [file 41525_2022_293_MOESM1_ESM.pdf]

## Supplementary Information

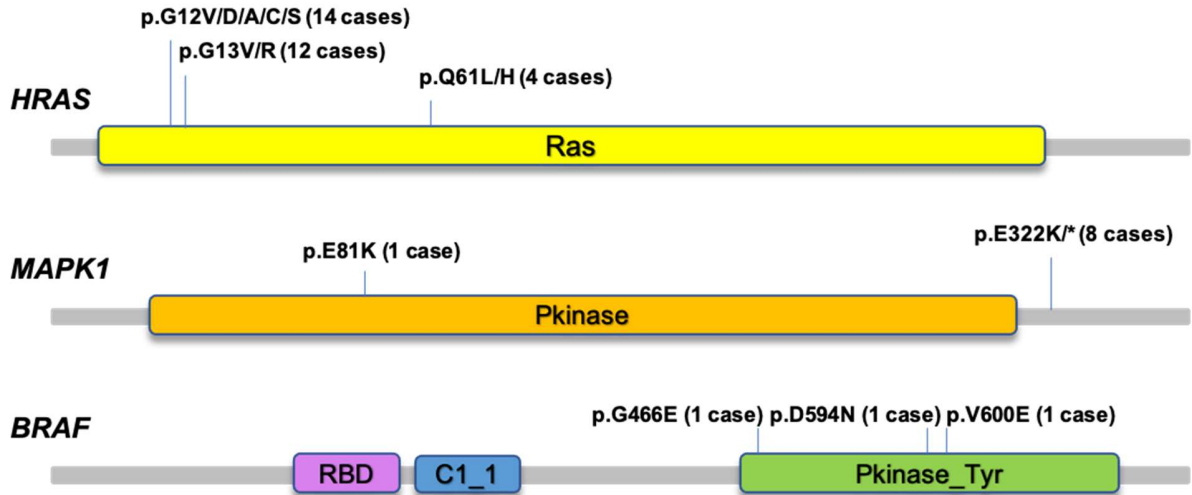

**Supplementary Figure 1:** Well-known activating MAPK pathway mutations found in TCGA HNSCC cohort. *Abbreviation:* Ras: Ras family (5 - 164), Pkinase: Protein kinase domain (25 - 313), RBD: Raf-like Ras-binding domain (156 - 227), C1\_1: Phorbol esters/diacylglycerol binding domain (C1 domain) (235 - 280), Pkinase\_Tyr: Protein tyrosine kinase (458 - 712).
